# Supplementary material for: Synergy and remarkable specificity of antimicrobial peptides in vivo using a systematic knockout approach
Source: eLife. 2019 Feb 26;8:e44341. doi: 10.7554/eLife.44341 (PMC6398976; doi:10.7554/eLife.44341)
Supplement: Figure 2—source data 1. [file elife-44341-fig2-data1.xlsx]

## Sheet: Sheet1
p-values from Fig. 2A Cox proportional hazards model compared to iso w1118 baseline.								Heatmap boundaries:		p > .05	.05 > p > .001	.001 > p > 2E-16	p < 2E-16	N/A
	Gram-negative bacteria						Gram-positive bacteria				Fungi
Genotype	Ecc15	E. coli	S. typhimurium	E. cloacae	P. burhodogranariea	P. rettgeri	B. subtilis	L. innocua	E. faecalis	S. aureus	B. bassiana	M. anisopliae	C. albicans	A. fumigatus
OR-R	0.0822	0.0798	0.5418	0.935	0.00084	5.31e-06	0.077	0.361	0.004	0.621	1.43e-05	0.000582	0.042	0.233
RelE20	<2E-16	3.06e-12	3.19e-06	<2E-16	<2E-16	<2E-16	0.043	N/A	N/A	N/A	N/A	N/A	N/A	N/A
Spzrm7	N/A	N/A	N/A	N/A	N/A	N/A	1.28e-12	<2E-16	<2E-16	0.003	<2E-16	3.35e-06	<2E-16	<2E-16
BomΔ55C	N/A	N/A	N/A	N/A	N/A	N/A	5.69e-11	<2E-16	<2E-16	6.66e-07	<2E-16	<2E-16	2.45e-07	<2E-16
ΔAMPs	<2E-16	4.05e-06	0.00016	4.7e-13	<2E-16	<2E-16	0.071	0.068	0.012	0.03	0.001	0.018	6.4e-05	0.000635
