# Supplementary material for: Synergy and remarkable specificity of antimicrobial peptides in vivo using a systematic knockout approach
Source: eLife journal article supplement (doi:10.7554/elife.44341), 2019-02-25
Supplement: supp [file elife_poa_e44341_Figure_1_figure_supplement_1.pdf › elife_poa_e44341_Figure_1_figure_supplement_1.pdf]

# Figure 1 supplement 1

|                                                                                    |                                                                                                                                               | Genes affected                                                    |
|------------------------------------------------------------------------------------|-----------------------------------------------------------------------------------------------------------------------------------------------|-------------------------------------------------------------------|
|   | <i>Def</i> wt<br><i>Def</i> <sup>SK3</sup><br>GCGCAGGCTCAGCCAGTTTCCGATGTGGATCCAATTC<br>GCGCAGGCTCAGCC t G a T - - - - TGTGGATCCAATTC          | <i>Defensin</i> - Group A                                         |
|  | <i>Cec</i> wt<br><i>Cec</i> <sup>SK6</sup><br>GCTTGGGAATCAG / 6,095bp deletion / GTCCATCAAAGG<br>GCTTGGGAAT - - - - - CATCAAAGG               | <i>Cecropin A1, Cecropin A2, Cecropin B, Cecropin C</i> - Group A |
|  | <i>Dro</i> wt<br><i>Dro</i> <sup>SK4</sup><br>TTGCCATGGGTGTGGCCACT - CCCGGCAAGCCACGCC<br>TTGCCATGG c TGTGGCCACT c CCCGGCAAGCCACGCC            | <i>Drosocin</i> - Group B                                         |
|  | <i>Dro-AttAB</i> wt<br><i>Dro-AttAB</i> <sup>SK2</sup><br>TCAGTTCGATTT / 4,010bp deletion / CGGTTAAATATT<br>TCAGTTCGA - - - - - TTAAATATT     | <i>Drosocin, Attacin A, Attacin B</i> - Group B                   |
|  | <i>Dpt</i> wt<br><i>Dpt</i> <sup>SK1</sup><br>TAGATAAGGTGA / 2,137bp deletion / AGGGCACTTCAG<br>TAGATAAGG - - - - - GCACTTCAG                 | <i>Diptericin A, Diptericin B</i> - Group B                       |
|  | <i>AttD</i> wt<br><i>AttD</i> <sup>SK1</sup><br>CAACCGCCCAATGCGGAGTAAGGGTCGGTGATGATCT<br>CAACCGCCCAATGCGG - - - - - AGGGTCGGTGATGATCT         | <i>Attacin D</i> - Group B                                        |
|  | <i>Mtk</i> wt<br><i>Mtk</i> <sup>R1</sup><br>ATTCCCGCCACCGAGCTAAGATGCAACTTAATCTTGG<br>ATTCCCGCCACCGAGCTAAG g c t a g c a c a t AT g c a GG    | <i>Metchnikowin</i> - Group C                                     |
|  | <i>Drs</i> wt<br><i>Drs</i> <sup>R1</sup><br>CCGTGAGAACCTTTTTCCAATATGATGCAGATCAAGTA<br>CCGTGAGAACCTTTTTCCAAT g c t a g c a c a t a t g c a gg | <i>Drosomycin</i> - Group C                                       |
