# Supplementary material for: Synergy and remarkable specificity of antimicrobial peptides in vivo using a systematic knockout approach
Source: eLife. 2019 Feb 26;8:e44341. doi: 10.7554/eLife.44341 (PMC6398976; doi:10.7554/eLife.44341)
Supplement: Supplementary file 1. [file elife-44341-supp1.xlsx]

## Sheet: Sheet1
Table S1
Primers used for tracking mutations
Gene(s)	Mutation	Name	Sequence
Def	DefSK3	DefSK3new F	AGG CTC AGC CTG AAT TGT GG
		DefSK R	TGG TAA GTC GCT AAC GCT AAT
AttC	AttCMi	AttCKO F1	CTT GGG CTG CAG ATT GTT
		AttCKO R1	GCC AAC GAT GAC CAC AAT
Dro	DroSK4	DroSK4 F	GGC TGT GGC CAC TCC CC
		DroSK4 R	GTG TCA ACG AAA AGT TTG CAC
Dro, AttA, AttB	Dro-AttABSK2	DroAttCas F	TTG CCT TCA GTC GCC TAT
		DroAttCas R	TCA TTG AGT GGG ATC GAA
Mtk	MtkR1	MetchKO F1	CTG GCC ACA ATC GGT TAT
		mCher R1	AAG CGC ATG AAC TCC TTG
DptA, DptB	DptSK1	Dpt-DptB-120 F	CCT CGT TTA AGA AAG ATC
		Dpt-DptB+254 R	GGT GGG TCT GTA AAC TTG GAT GAC GAG
Drs	DrsR1	DrsKO F1	GCG TCC CAG TCA AAG GTA
		mCher R1	AAG CGC ATG AAC TCC TTG
AttD	AttDSK1	dAttD F2	CGC CCA ATG CGG AGG GT
		dAttD R	TGG CGT TGA GGT TGA GAT
CecA1, CecA2, CecB, CecC	CecSK6	CecShu F2	CCG ACT TAG AAA GAT AGA
		CecShu R2	CCA CCC TGG GAA AGT GTA
Primers used for qPCR
Gene	Source	Name	Sequence
DptA	Hanson et al. (2016)	DptA-HanF	ATG CCC GAC GAC ATG ACC AT
		DptA-HanR	TTG TCG GTG GTC CAC ACC TT
Drs	Bruno Lemaitre	Drom-F	CGTGAGAACCTTTTCCAATATGAT
		Drom-R	TCCCAGGACCACCAGCAT
Dro	Hanson et al. (2016)	Dro-161F	ACTGGCCATCGAGGATCACC
		Dro-246R	TCTCCGCGGTATGCACACAT
CG5791	Hanson et al. (2016)	CG5791-70F	CTGATCGGCGCTCATCCCAG
		CG5791-187R	GGGATGAGGAGAAGCTGCGG
IMPPP	This study	IMPPP 230F	GGTGAGCATGTGTACACCGA
		IMPPP 331R	GGCGGAAAAATTGGGACCAC
Pirk	Kounatidis et al. (2017)	Pirk F	CGATGACGAGTGCTCCAC
		Pirk R	TGCTGCCCAGGTAGATCC
PGRP-LB	Iatsenko et al. (2016)	PGRP-LB F	GGACATGCAGGACTTCCA
		PGRP-LB R	GGTTCTCCAATCTCCGAT
Rp49/RpL32	Bruno Lemaitre	RpL32 F	GCC GCT TCA AGG GAC AGT ATC TG
		RpL32 R	AAA CGC GGT TCT GCA TGA G
