# Supplementary figures and images for: Synergy and remarkable specificity of antimicrobial peptides in vivo using a systematic knockout approach
Source: eLife journal article supplement (doi:10.7554/elife.44341), 2019-02-25

**Figure 1 supplement 2**

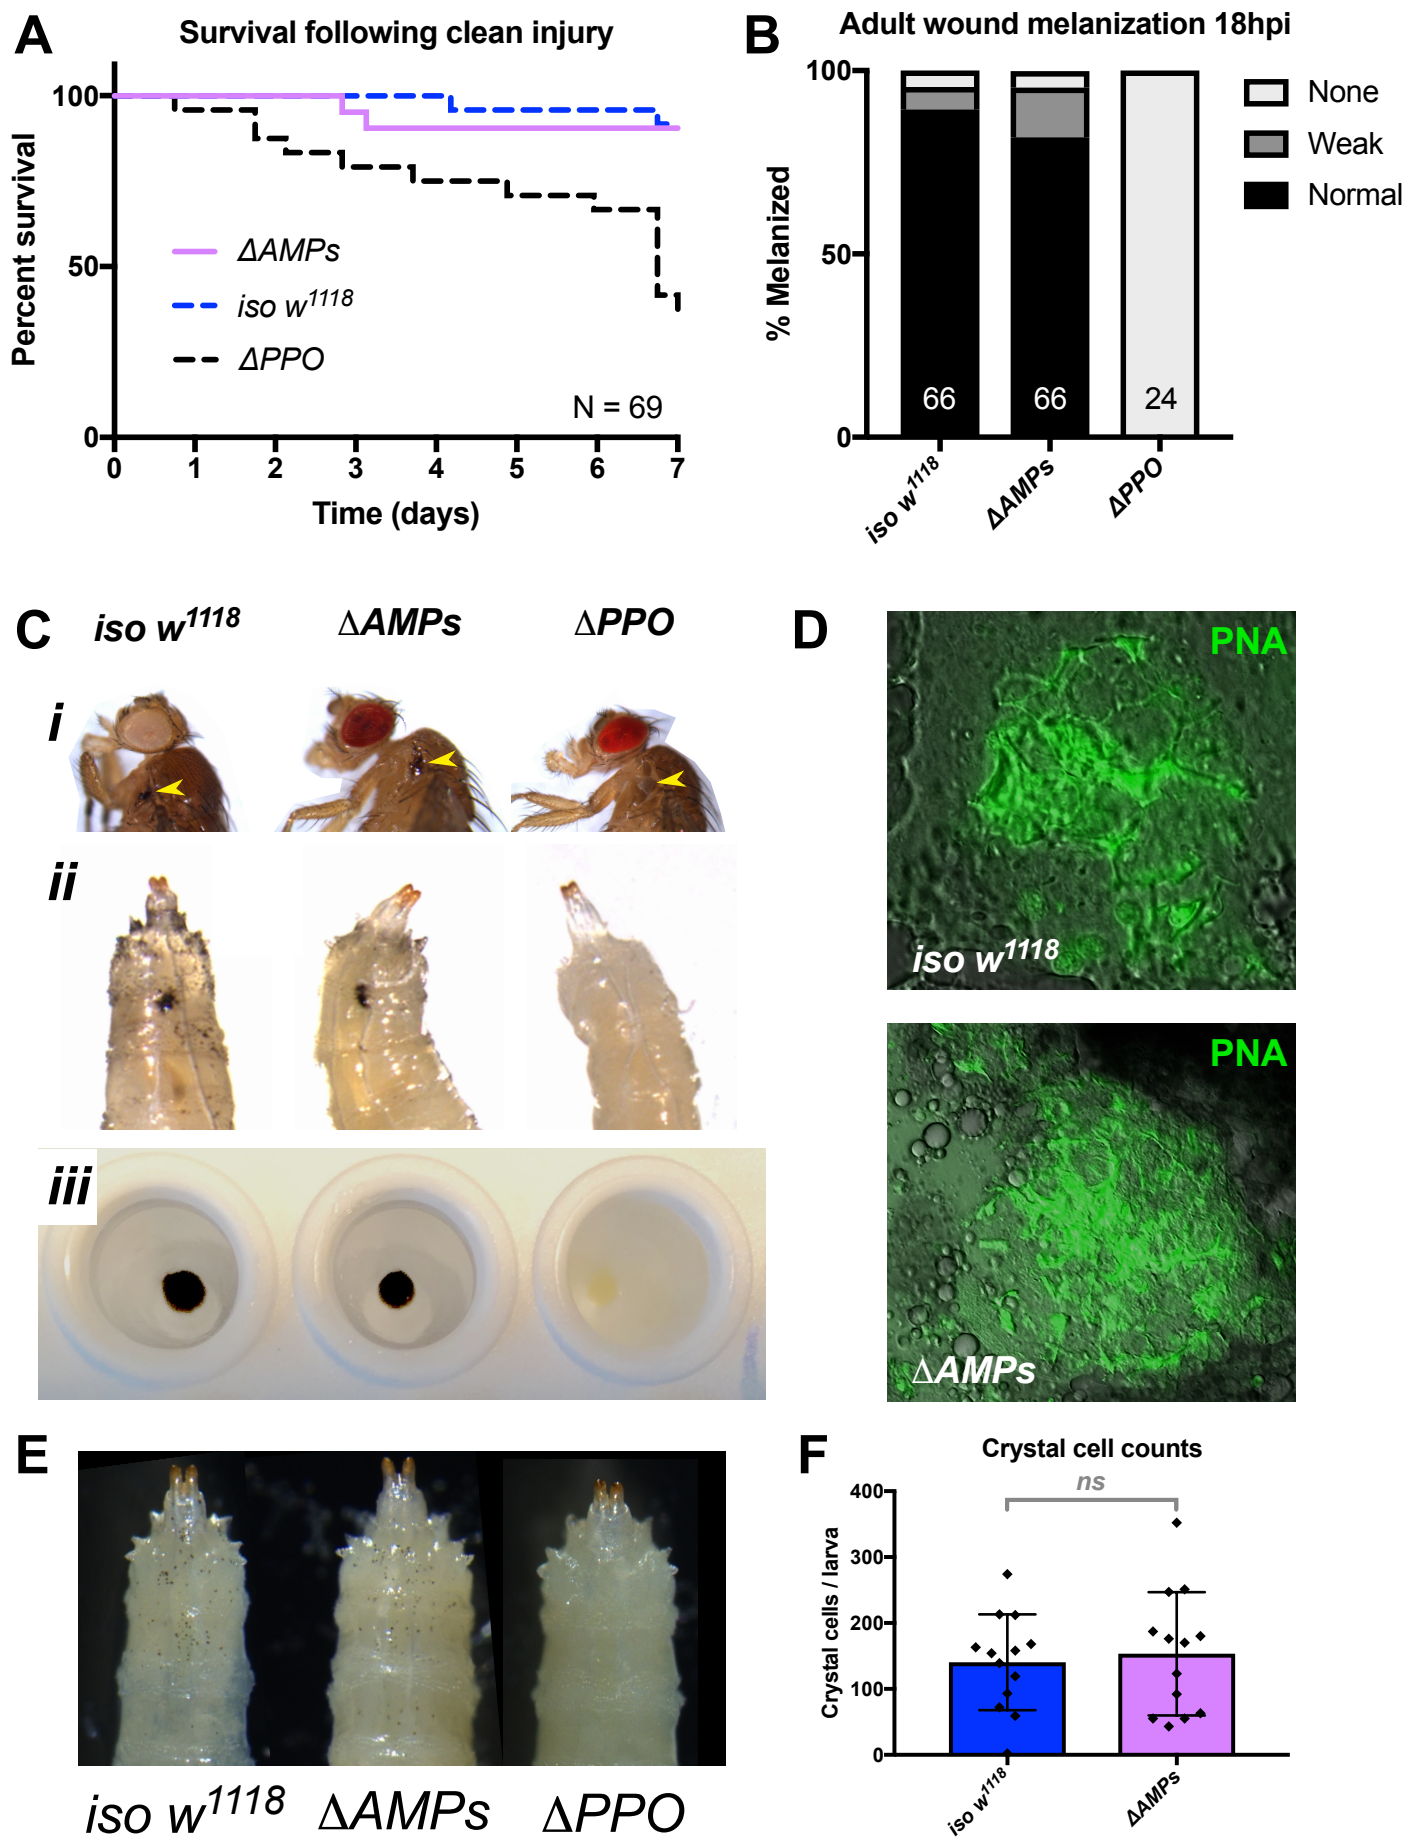

Supplement: supp [file elife_poa_e44341_Figure_1_figure_supplement_2.pdf › elife_poa_e44341_Figure_1_figure_supplement_2.pdf]

Figure 2 supplement

A i)

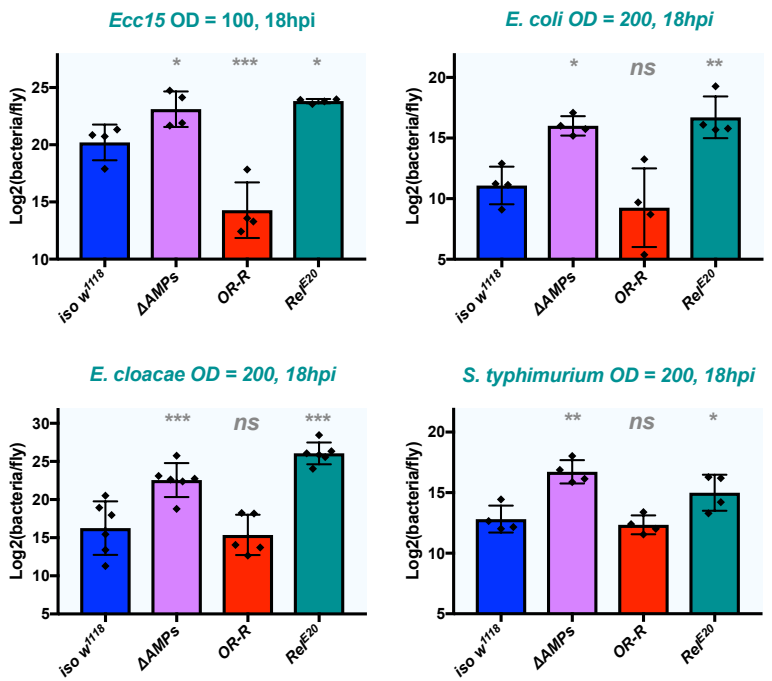

B

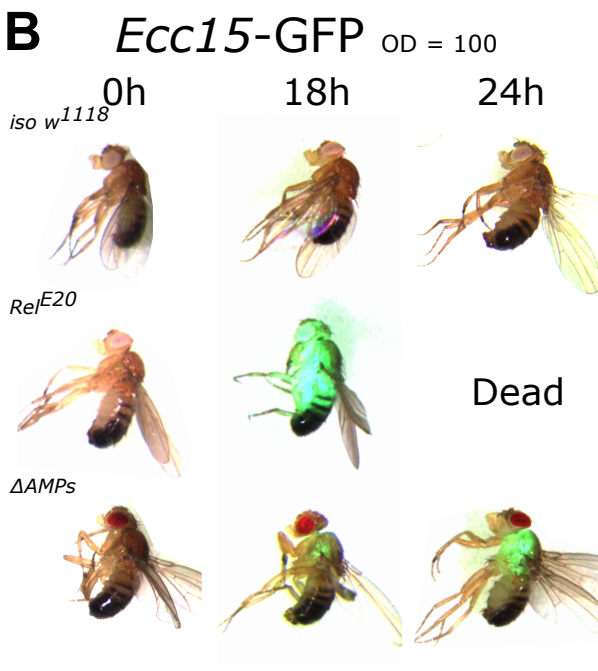

C

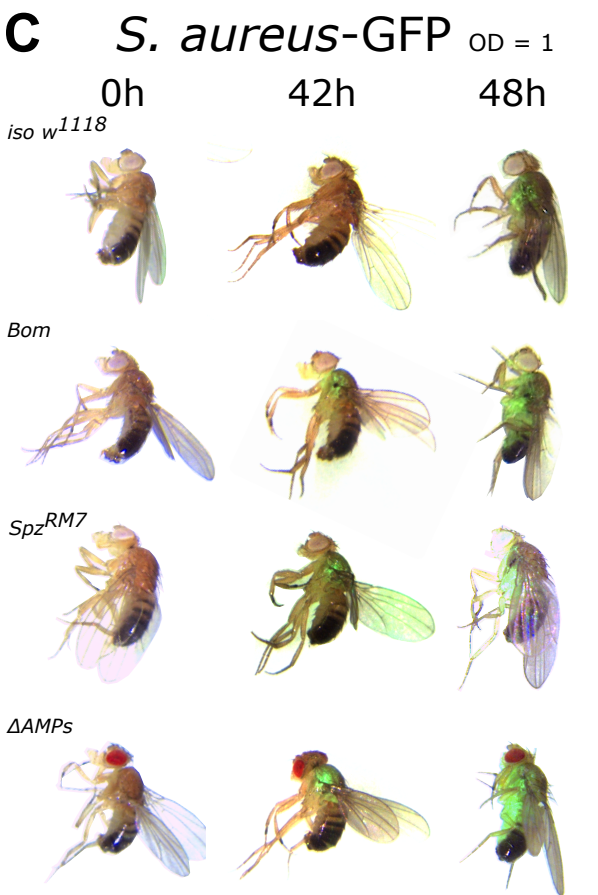

ii)

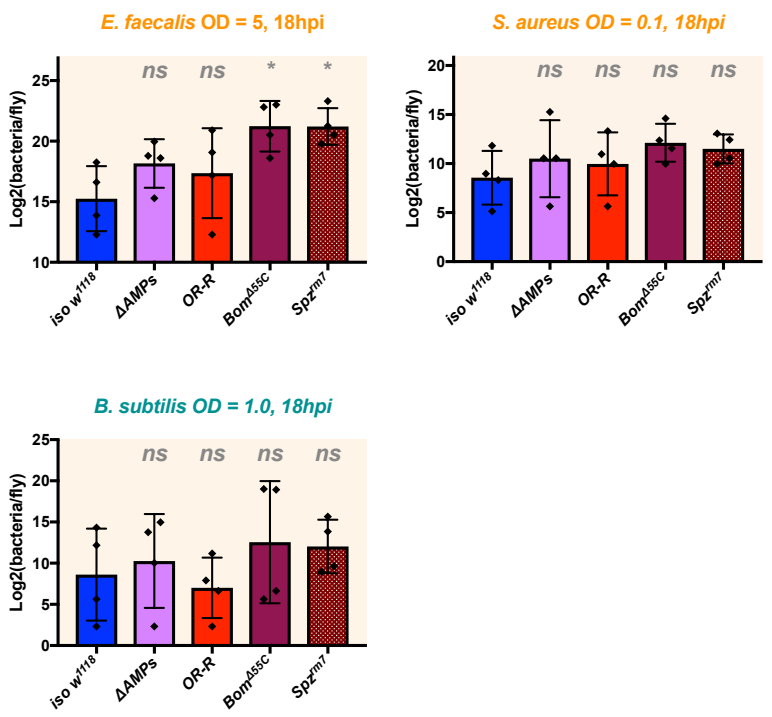

Supplement: supp [file elife_poa_e44341_Figure_2_figure_supplement_1.pdf › elife_poa_e44341_Figure_2_figure_supplement_1.pdf]

# Figure 4 supplement

## A *P. burhodogranariae*, OD = 10

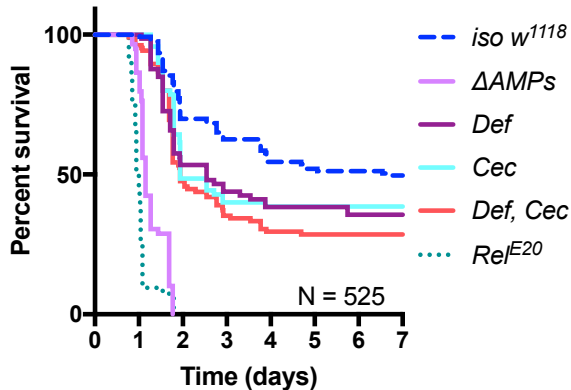

## B *Ecc15*, OD = 10

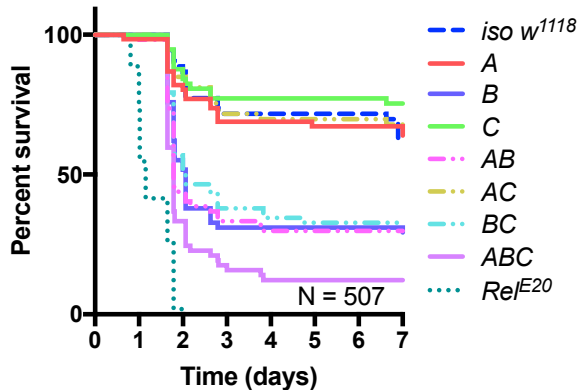

Supplement: supp [file elife_poa_e44341_Figure_4_figure_supplement_1.pdf › elife_poa_e44341_Figure_4_figure_supplement_1.pdf]

# Figure 5 supplement

**A***P. rettgeri*, OD = 0.1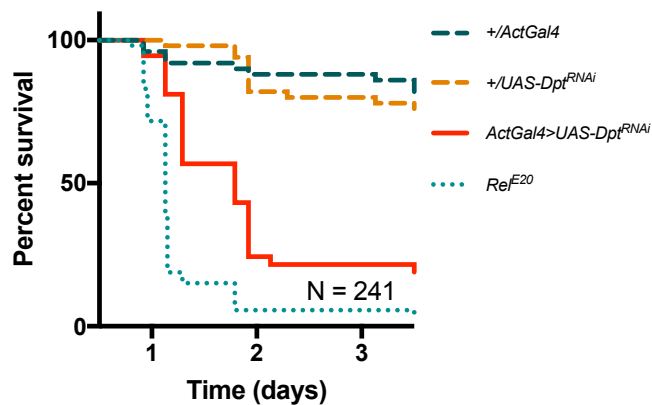**B***DptA* RNAi validation 6hpi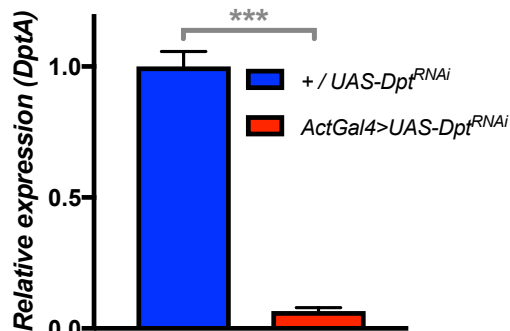**C***P. stuartii*, OD = 0.1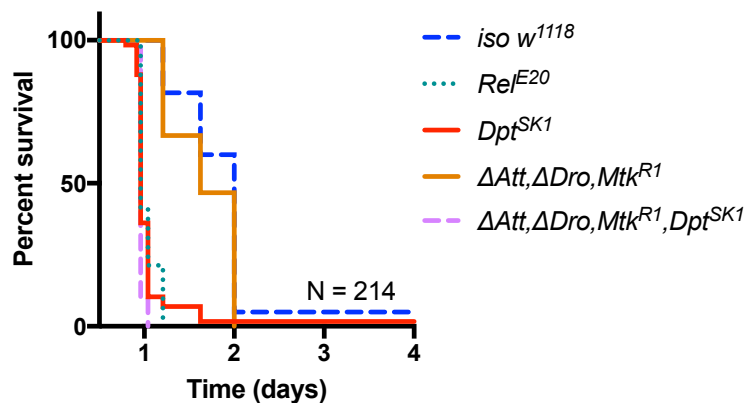

Supplement: supp [file elife_poa_e44341_Figure_5_figure_supplement_1.pdf › elife_poa_e44341_Figure_5_figure_supplement_1.pdf]

# Figure 6 supplement

**A**

*E. cloacae*, OD = 10

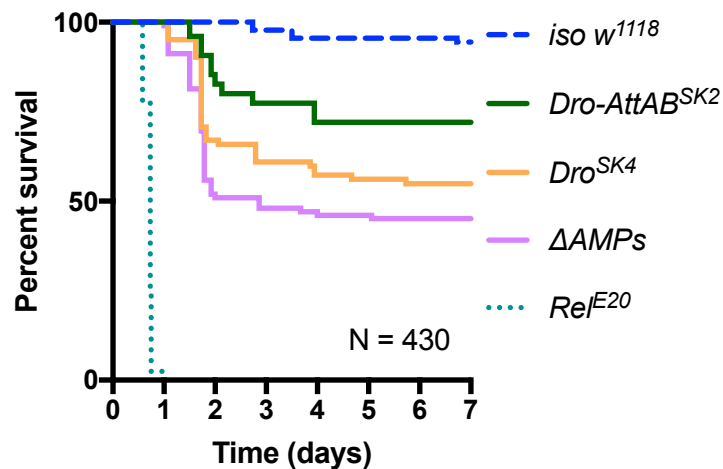

**B**

*E. cloacae*, OD = 200

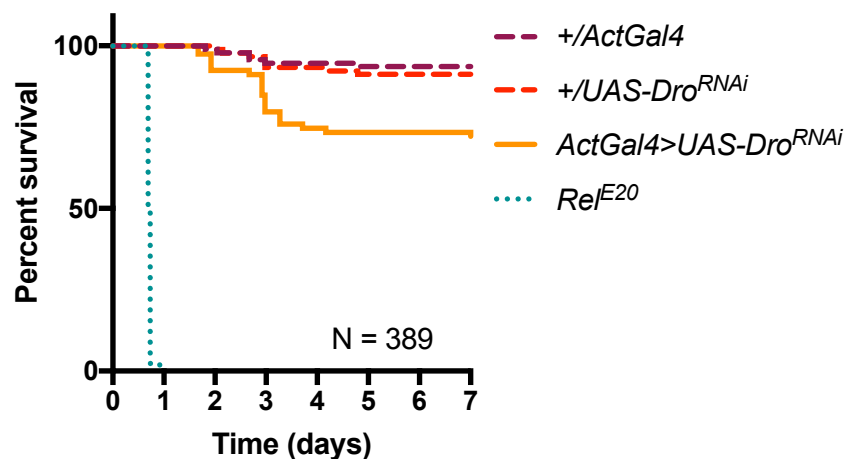

**C**

*Dro RNAi validation 6hpi*

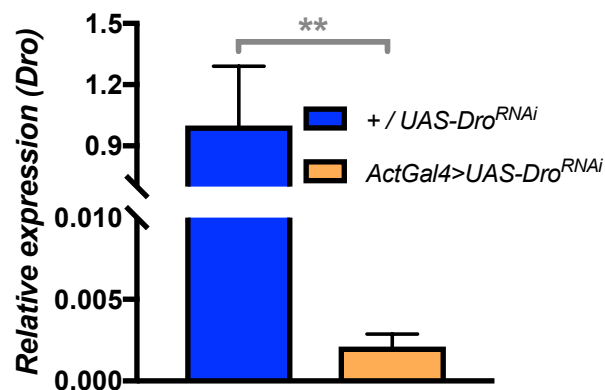

Supplement: supp [file elife_poa_e44341_Figure_6_figure_supplement_1.pdf › elife_poa_e44341_Figure_6_figure_supplement_1.pdf]
